# Supplementary material for: De Novo Transcriptome Analysis Reveals Abundant Gonad-specific Genes in the Ovary and Testis of Henosepilachna vigintioctopunctata
Source: PubMed Central journal article supplement (PMC6747241; doi:10.3390/ijms20174084), 2019-08-21
Supplement: ijms-20-04084-s001.pdf [file ijms-20-04084-s001.pdf]

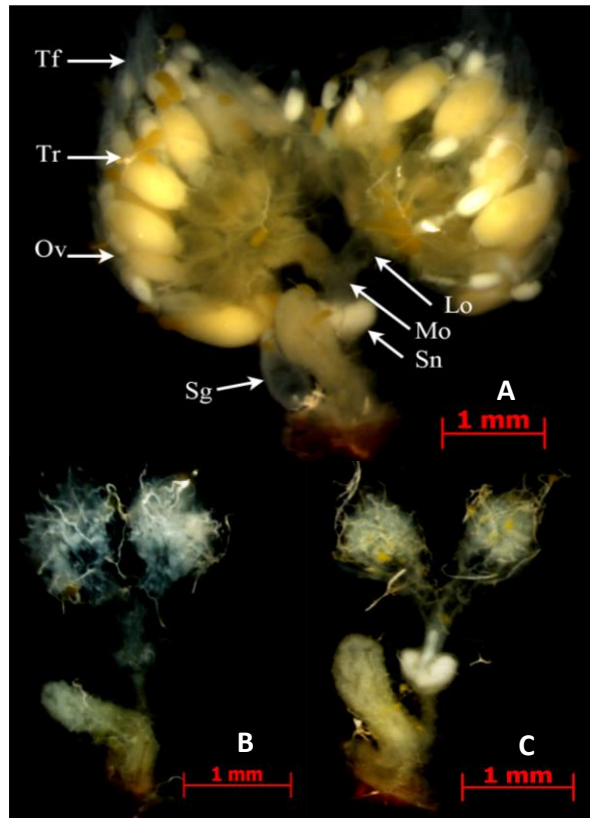

**Figure S1.** The female reproductive system of *H. vigintioctopunctata*. A: representative picture which the reproductive system was dissected from the mated female in the dsGFP control group. B: representative picture which the reproductive system was dissected from the unmated female in the dsGFP control group. C: representative picture which the reproductive system was dissected from the mated female in the dsGFP/ dsRC2-like/dsPSHS-like treated groups which did not lay eggs. Lo: lateral oviduct; Sg: spermathecal gland; Tf: terminal filament; Mo: median oviduct; Sn: seminal node; Tr: trachea; Ov: ovariole.

**Table S1.** Gonadal development related genes in *H. vigintioctopunctata* ovary and testis transcriptomes

| Genes                                                                  | Matched species                  | Length<br>(bp) | E value   | Identity<br>(%) |
|------------------------------------------------------------------------|----------------------------------|----------------|-----------|-----------------|
| <b>Oocyte meiosis</b>                                                  |                                  |                |           |                 |
| adenylate cyclase type 8                                               | <i>Anoplophora glabripennis</i>  | 1924           | 2.00E-164 | 69.83           |
| PREDICTED: adenylate cyclase type 2 isoform X4                         | <i>Dendroctonus ponderosae</i>   | 2992           | 0         | 70.15           |
| PREDICTED: adenylate cyclase type 3                                    | <i>Tribolium castaneum</i>       | 2838           | 2.00E-174 | 71.98           |
| anaphase-promoting complex subunit 4                                   | <i>Anoplophora glabripennis</i>  | 2666           | 5.00E-53  | 65.92           |
| PREDICTED: anaphase-promoting complex subunit 2                        | <i>Tribolium castaneum</i>       | 3131           | 2.00E-169 | 68.43           |
| calcium-binding protein E63-1                                          | <i>Anoplophora glabripennis</i>  | 615            | 8.00E-30  | 68.73           |
| cell division cycle protein 23 homolog                                 | <i>Anoplophora glabripennis</i>  | 1849           | 0         | 73.85           |
| cell division cycle protein 27 homolog                                 | <i>Anoplophora glabripennis</i>  | 3090           | 5.00E-91  | 69.22           |
| cell division cycle protein 16 homolog                                 | <i>Anoplophora glabripennis</i>  | 1855           | 5.00E-139 | 75.56           |
| serine/threonine-protein phosphatase 2A catalytic subunit beta isoform | <i>Leptinotarsa decemlineata</i> | 2785           | 0         | 76.76           |
| serine/threonine-protein kinase 10 isoform X3                          | <i>Anoplophora glabripennis</i>  | 4892           | 0         | 69.48           |
| PREDICTED: serine/threonine-protein kinase mos                         | <i>Tribolium castaneum</i>       | 1708           | 7.00E-13  | 66.56           |

|                                                                                                          |                                  |      |           |       |
|----------------------------------------------------------------------------------------------------------|----------------------------------|------|-----------|-------|
| PREDICTED: serine/threonine-protein phosphatase 2A<br>56 kDa regulatory subunit gamma isoform isoform X4 | <i>Tribolium castaneum</i>       | 3501 | 0         | 73.59 |
| cAMP-dependent protein kinase catalytic subunit<br>alpha-like                                            | <i>Leptinotarsa decemlineata</i> | 770  | 3.00E-28  | 67.8  |
| PREDICTED: cAMP-dependent protein kinase catalytic<br>subunit-like                                       | <i>Agrilus planipennis</i>       | 1362 | 6.00E-103 | 70.96 |
| 14-3-3 protein epsilon                                                                                   | <i>Zootermopsis nevadensis</i>   | 1038 | 7.00E-146 | 75.53 |
| 14-3-3 protein zeta isoform X1                                                                           | <i>Anoplophora glabripennis</i>  | 2161 | 0         | 83.52 |
| structural maintenance of chromosomes protein 3                                                          | <i>Anoplophora glabripennis</i>  | 3851 | 0         | 75.59 |
| PREDICTED: structural maintenance of chromosomes<br>protein 1A                                           | <i>Tribolium castaneum</i>       | 4067 | 0         | 74.69 |
| beta-TrCP isoform X3                                                                                     | <i>Anoplophora glabripennis</i>  | 2114 | 0         | 76.69 |
| FK506-binding protein 59                                                                                 | <i>Anoplophora glabripennis</i>  | 1584 | 2.00E-86  | 65.96 |
| dual specificity mitogen-activated protein kinase kinase<br>dSOR1                                        | <i>Anoplophora glabripennis</i>  | 2118 | 0         | 78.13 |
| ribosomal protein S6 kinase 2 beta isoform X2                                                            | <i>Anoplophora glabripennis</i>  | 3142 | 0         | 71.32 |
| mitotic checkpoint serine/threonine-protein kinase BUB1<br>beta                                          | <i>Anoplophora glabripennis</i>  | 3658 | 2.00E-98  | 73.21 |

|                                                                                             |                                  |      |           |       |
|---------------------------------------------------------------------------------------------|----------------------------------|------|-----------|-------|
| mitogen-activated protein kinase 1                                                          | <i>Anoplophora glabripennis</i>  | 2301 | 0         | 77.13 |
| separin                                                                                     | <i>Leptinotarsa decemlineata</i> | 6148 | 3.00E-33  | 67.41 |
| anaphase-promoting complex subunit 10                                                       | <i>Leptinotarsa decemlineata</i> | 1072 | 2.00E-137 | 80.87 |
| serine protease HTRA2, mitochondrial-like                                                   | <i>Leptinotarsa decemlineata</i> | 1496 | 3.00E-31  | 72.62 |
| rutabaga                                                                                    | <i>Tribolium castaneum</i>       | 7751 | 0         | 73.02 |
| poly                                                                                        | <i>Onthophagus taurus</i>        | 4279 | 0         | 79.64 |
| RING-box protein 1A                                                                         | <i>Onthophagus taurus</i>        | 588  | 6.00E-89  | 81.16 |
| Calmodulin                                                                                  | <i>Stylophora pistillata</i>     | 879  | 6.00E-05  | 80.77 |
| protein phosphatase 1 catalytic subunit, partial                                            | <i>Colaphellus bowringi</i>      | 1795 | 0         | 78.43 |
| acid phosphatase, partial                                                                   | <i>Cryptolaemus montrouzieri</i> | 2868 | 0         | 87.05 |
| PREDICTED: membrane-associated tyrosine- and threonine-specific cdc2-inhibitory kinase-like | <i>Dendroctonus ponderosae</i>   | 2365 | 0.004     | 66.06 |
| PREDICTED: 14-3-3 protein zeta isoform X3                                                   | <i>Dendroctonus ponderosae</i>   | 1175 | 2.00E-68  | 80.07 |
| PREDICTED: cell division cycle protein 16 homolog                                           | <i>Aethina tumida</i>            | 689  | 2.00E-37  | 71.72 |
| PREDICTED: cyclin-dependent kinase 2-like                                                   | <i>Aethina tumida</i>            | 1454 | 2.00E-141 | 72.06 |
| PREDICTED: uncharacterized protein LOC108739266                                             | <i>Agrius planipennis</i>        | 1081 | 1.00E-53  | 74.77 |

|                                                                                        |                                    |      |           |       |
|----------------------------------------------------------------------------------------|------------------------------------|------|-----------|-------|
| PREDICTED: S-phase kinase-associated protein 1                                         | <i>Agrilus planipennis</i>         | 305  | 6.00E-51  | 78.81 |
| PREDICTED: S-phase kinase-associated protein 1 isoform X1                              | <i>Ceratosolen solmsi marchali</i> | 845  | 3.00E-27  | 66.59 |
| PREDICTED: inositol 1,4,5-trisphosphate receptor isoform X3                            | <i>Tribolium castaneum</i>         | 8858 | 0         | 73.04 |
| PREDICTED: cullin-1                                                                    | <i>Tribolium castaneum</i>         | 3231 | 0         | 74.24 |
| PREDICTED: calcium/calmodulin-dependent protein kinase type II alpha chain isoform X10 | <i>Tribolium castaneum</i>         | 1504 | 0         | 75.42 |
| PREDICTED: cytoplasmic polyadenylation element-binding protein 1-B                     | <i>Tribolium castaneum</i>         | 6685 | 2.00E-165 | 76.25 |
| <b>Ovarian steroidogenesis</b>                                                         |                                    |      |           |       |
| insulin-like receptor                                                                  | <i>Anoplophora glabripennis</i>    | 7550 | 9.00E-143 | 72.23 |
| adenylate cyclase type 8                                                               | <i>Anoplophora glabripennis</i>    | 1924 | 2.00E-164 | 69.83 |
| PREDICTED: adenylate cyclase type 3                                                    | <i>Tribolium castaneum</i>         | 2838 | 2.00E-174 | 71.98 |
| cAMP-dependent protein kinase catalytic subunit alpha-like                             | <i>Leptinotarsa decemlineata</i>   | 770  | 3.00E-28  | 67.8  |
| PREDICTED: cAMP-dependent protein kinase catalytic subunit-like                        | <i>Agrilus planipennis</i>         | 1362 | 4.00E-103 | 70.96 |

|                                                     |                                  |      |           |       |
|-----------------------------------------------------|----------------------------------|------|-----------|-------|
| rutabaga                                            | <i>Tribolium castaneum</i>       | 7751 | 0         | 73.02 |
| PREDICTED: adenylate cyclase type 2 isoform X4      | <i>Dendroctonus ponderosae</i>   | 2992 | 0         | 70.15 |
| PREDICTED: guanine nucleotide-binding protein G     | <i>Anoplophora glabripennis</i>  | 3377 | 1.00E-82  | 70.47 |
| PREDICTED: scavenger receptor class B member 1-like | <i>Agrilus planipennis</i>       | 1994 | 6.00E-78  | 66.16 |
| PREDICTED: probable cytochrome P450 303a1           | <i>Tribolium castaneum</i>       | 795  | 2.00E-29  | 66.06 |
| <b>Progesterone-mediated oocyte maturation</b>      |                                  |      |           |       |
| anaphase-promoting complex subunit 4                | <i>Anoplophora glabripennis</i>  | 2666 | 5.00E-53  | 65.92 |
| anaphase-promoting complex subunit 10               | <i>Leptinotarsa decemlineata</i> | 1072 | 2.00E-137 | 80.87 |
| cell division cycle protein 23 homolog              | <i>Anoplophora glabripennis</i>  | 1849 | 0         | 73.85 |
| cell division cycle protein 27 homolog              | <i>Anoplophora glabripennis</i>  | 3090 | 5.00E-91  | 69.22 |
| heat shock protein 83-like                          | <i>Centruroides sculpturatus</i> | 969  | 2.00E-135 | 72.55 |
| heat shock protein 90                               | <i>Tribolium castaneum</i>       | 2435 | 0         | 76.23 |
| PREDICTED: heat shock protein HSP 90-alpha-like     | <i>Hyalella azteca</i>           | 1326 | 0         | 76.43 |
| adenylate cyclase type 8                            | <i>Anoplophora glabripennis</i>  | 1924 | 2.00E-164 | 69.83 |
| PREDICTED: adenylate cyclase type 2 isoform X4      | <i>Dendroctonus ponderosae</i>   | 2992 | 0         | 70.15 |
| PREDICTED: adenylate cyclase type 3                 | <i>Tribolium castaneum</i>       | 2838 | 2.00E-174 | 71.98 |

|                                                                   |                                  |      |           |       |
|-------------------------------------------------------------------|----------------------------------|------|-----------|-------|
| cAMP-dependent protein kinase catalytic subunit alpha-like        | <i>Leptinotarsa decemlineata</i> | 770  | 3.00E-28  | 67.8  |
| PREDICTED: cAMP-dependent protein kinase catalytic subunit-like   | <i>Agrilus planipennis</i>       | 1362 | 6.00E-103 | 70.96 |
| mitogen-activated protein kinase 1                                | <i>Anoplophora glabripennis</i>  | 2301 | 0         | 77.13 |
| mitotic checkpoint serine/threonine-protein kinase BUB1 beta      | <i>Anoplophora glabripennis</i>  | 3658 | 2.00E-98  | 73.21 |
| mitotic spindle assembly checkpoint protein MAD1-like             | <i>Anoplophora glabripennis</i>  | 2604 | 3.00E-24  | 64.24 |
| phosphatidylinositol 3-kinase regulatory subunit alpha isoform X2 | <i>Anoplophora glabripennis</i>  | 8011 | 2.00E-69  | 64.9  |
| probable ATP-dependent RNA helicase DDX27                         | <i>Anoplophora glabripennis</i>  | 2782 | 0         | 70.33 |
| ribosomal protein S6 kinase 2 beta isoform X2                     | <i>Anoplophora glabripennis</i>  | 3142 | 0         | 71.32 |
| raf homolog serine/threonine-protein kinase phl                   | <i>Anoplophora glabripennis</i>  | 3433 | 0         | 73.44 |
| dual specificity mitogen-activated protein kinase kinase dSOR1    | <i>Anoplophora glabripennis</i>  | 2118 | 0         | 78.13 |
| rutabaga                                                          | <i>Tribolium castaneum</i>       | 7751 | 0         | 73.02 |
| RAC serine/threonine-protein kinase isoform X2                    | <i>Leptinotarsa decemlineata</i> | 2024 | 0         | 73.09 |
| RNA-binding protein 41                                            | <i>Harmonia axyridis</i>         | 2116 | 5.00E-20  | 65.35 |

|                                                                    |                                  |      |           |       |
|--------------------------------------------------------------------|----------------------------------|------|-----------|-------|
| protein enhancer of sevenless 2B                                   | <i>Zootermopsis nevadensis</i>   | 1362 | 4.00E-36  | 67.17 |
| PREDICTED: cell division cycle protein 16 homolog                  | <i>Aethina tumida</i>            | 689  | 2.00E-37  | 71.72 |
| PREDICTED: cyclin-dependent kinase 2-like                          | <i>Aethina tumida</i>            | 1454 | 2.00E-141 | 72.06 |
| PREDICTED: uncharacterized protein LOC108739266                    | <i>Agrilus planipennis</i>       | 1081 | 1.00E-53  | 74.77 |
| PREDICTED: fizzy-related protein homolog                           | <i>Tribolium castaneum</i>       | 3134 | 0         | 73.3  |
| PREDICTED: cytoplasmic polyadenylation element-binding protein 1-B | <i>Tribolium castaneum</i>       | 6685 | 2.00E-165 | 76.25 |
| PREDICTED: anaphase-promoting complex subunit 2                    | <i>Tribolium castaneum</i>       | 3131 | 2.00E-169 | 68.43 |
| PREDICTED: G protein alpha i subunit                               | <i>Tribolium castaneum</i>       | 3106 | 0         | 73.79 |
| PREDICTED: serine/threonine-protein kinase mos                     | <i>Tribolium castaneum</i>       | 1708 | 7.00E-13  | 66.56 |
| <b>Estrogen signaling pathway</b>                                  |                                  |      |           |       |
| testis-specific heat shock protein cognate 70-6                    | <i>Laodelphax striatella</i>     | 367  | 3.00E-13  | 73.28 |
| heat shock protein 68                                              | <i>Harmonia axyridis</i>         | 2242 | 0         | 78.25 |
| heat shock protein 70                                              | <i>Harmonia axyridis</i>         | 3004 | 0         | 73.57 |
| heat shock protein 68-like                                         | <i>Leptinotarsa decemlineata</i> | 1720 | 0         | 75.03 |
| heat shock protein 83-like                                         | <i>Centruroides sculpturatus</i> | 969  | 2.00E-135 | 72.55 |



|                                                                   |                                  |      |           |       |
|-------------------------------------------------------------------|----------------------------------|------|-----------|-------|
| heat shock protein 90                                             | <i>Tribolium castaneum</i>       | 2435 | 0         | 76.23 |
| heat shock 70 kDa protein cognate 4-like                          | <i>Centruroides sculpturatus</i> | 2161 | 0         | 71.64 |
| PREDICTED: heat shock 70 kDa protein cognate 2                    | <i>Tribolium castaneum</i>       | 744  | 8.00E-141 | 78.17 |
| PREDICTED: heat shock 70 kDa protein cognate 4 isoform X2         | <i>Megachile rotundata</i>       | 312  | 3.00E-23  | 85.11 |
| PREDICTED: heat shock protein HSP 90-alpha-like                   | <i>Hyalella azteca</i>           | 1326 | 0         | 76.43 |
| adenylate cyclase type 8                                          | <i>Anoplophora glabripennis</i>  | 1924 | 2.00E-164 | 69.83 |
| PREDICTED: adenylate cyclase type 3                               | <i>Tribolium castaneum</i>       | 2838 | 2.00E-174 | 71.98 |
| calcium-binding protein E63-1                                     | <i>Anoplophora glabripennis</i>  | 615  | 8.00E-30  | 68.73 |
| cyclic AMP-responsive element-binding protein 3-like protein 1    | <i>Anoplophora glabripennis</i>  | 2996 | 3.00E-55  | 72.26 |
| dual specificity mitogen-activated protein kinase kinase dSOR1    | <i>Anoplophora glabripennis</i>  | 2118 | 0         | 78.13 |
| mitogen-activated protein kinase 1                                | <i>Anoplophora glabripennis</i>  | 2301 | 0         | 77.13 |
| rutabaga                                                          | <i>Tribolium castaneum</i>       | 7751 | 0         | 73.02 |
| phosphatidylinositol 3-kinase regulatory subunit alpha isoform X2 | <i>Anoplophora glabripennis</i>  | 8011 | 2.00E-69  | 64.9  |

|                                                                 |                                  |      |           |       |
|-----------------------------------------------------------------|----------------------------------|------|-----------|-------|
| G-protein alpha subunit                                         | <i>Lissorhoptrus oryzophilus</i> | 2446 | 0         | 79.53 |
| RAC serine/threonine-protein kinase isoform X2                  | <i>Leptinotarsa decemlineata</i> | 2024 | 0         | 73.09 |
| RNA-binding protein 41                                          | <i>Harmonia axyridis</i>         | 2116 | 5.00E-20  | 65.35 |
| FK506-binding protein 59                                        | <i>Anoplophora glabripennis</i>  | 1584 | 2.00E-86  | 65.96 |
| uncharacterized protein LOC111511578                            | <i>Leptinotarsa decemlineata</i> | 988  | 2.00E-08  | 69.54 |
| protein son of sevenless isoform X2                             | <i>Leptinotarsa decemlineata</i> | 5093 | 0         | 71.23 |
| cAMP-dependent protein kinase catalytic subunit alpha-like      | <i>Leptinotarsa decemlineata</i> | 770  | 3.00E-28  | 67.8  |
| Calmodulin                                                      | <i>Stylophora pistillata</i>     | 879  | 6.00E-05  | 80.77 |
| PREDICTED: cAMP-dependent protein kinase catalytic subunit-like | <i>Agrilus planipennis</i>       | 1362 | 6.00E-103 | 70.96 |
| PREDICTED: LOW QUALITY PROTEIN: heat shock protein 68-like      | <i>Aethina tumida</i>            | 1043 | 7.00E-146 | 73.66 |
| PREDICTED: protein enhancer of sevenless 2B                     | <i>Tribolium castaneum</i>       | 636  | 4.00E-55  | 82.55 |
| PREDICTED: inositol 1,4,5-trisphosphate receptor isoform X3     | <i>Tribolium castaneum</i>       | 8858 | 0         | 73.04 |
| PREDICTED: G protein alpha i subunit                            | <i>Tribolium castaneum</i>       | 3106 | 0         | 73.79 |

|                                                                   |                                  |      |           |       |
|-------------------------------------------------------------------|----------------------------------|------|-----------|-------|
| PREDICTED: SHC-transforming protein 1                             | <i>Tribolium castaneum</i>       | 5140 | 4.00E-130 | 69.36 |
| PREDICTED: guanine nucleotide-binding protein G                   | <i>Tribolium castaneum</i>       | 4488 | 0         | 79.31 |
| PREDICTED: endoplasmic                                            | <i>Linepithema humile</i>        | 2719 | 6.00E-174 | 67.15 |
| PREDICTED: adenylate cyclase type 2 isoform X4                    | <i>Dendroctonus ponderosae</i>   | 2992 | 0         | 70.15 |
| <b>Prolactin signaling pathway</b>                                |                                  |      |           |       |
| dual specificity mitogen-activated protein kinase kinase dSOR1    | <i>Anoplophora glabripennis</i>  | 2118 | 0         | 78.13 |
| mitogen-activated protein kinase 1                                | <i>Anoplophora glabripennis</i>  | 2301 | 0         | 77.13 |
| phosphatidylinositol 3-kinase regulatory subunit alpha isoform X2 | <i>Anoplophora glabripennis</i>  | 8011 | 2.00E-69  | 64.9  |
| protein son of sevenless isoform X2                               | <i>Leptinotarsa decemlineata</i> | 5093 | 0         | 71.23 |
| RAC serine/threonine-protein kinase isoform X2                    | <i>Leptinotarsa decemlineata</i> | 2024 | 0         | 73.09 |
| tyrosine hydroxylase                                              | <i>Tribolium castaneum</i>       | 2123 | 0         | 69.58 |
| RNA-binding protein 41                                            | <i>Harmonia axyridis</i>         | 2116 | 5.00E-20  | 65.35 |
| suppressor of cytokine signaling 2                                | <i>Harmonia axyridis</i>         | 2643 | 2.00E-114 | 70.63 |
| PREDICTED: G1/S-specific cyclin-D3-like                           | <i>Aethina tumida</i>            | 1476 | 3.00E-44  | 68    |
| PREDICTED: nuclear factor NF-kappa-B p110 subunit                 | <i>Tribolium castaneum</i>       | 3301 | 3.00E-78  | 68.03 |

isoform X1

|                                                       |                            |      |           |       |
|-------------------------------------------------------|----------------------------|------|-----------|-------|
| PREDICTED: SHC-transforming protein 1                 | <i>Tribolium castaneum</i> | 5140 | 4.00E-130 | 69.36 |
| PREDICTED: uncharacterized protein LOC662537          | <i>Tribolium castaneum</i> | 2939 | 5.00E-114 | 77.86 |
| PREDICTED: BAG family molecular chaperone regulator 2 | <i>Tribolium castaneum</i> | 851  | 3.00E-71  | 71.92 |
| PREDICTED: protein enhancer of sevenless 2B           | <i>Tribolium castaneum</i> | 636  | 4.00E-55  | 82.55 |

### **Thyroid hormone synthesis**

|                                                                           |                                 |      |           |       |
|---------------------------------------------------------------------------|---------------------------------|------|-----------|-------|
| adenylate cyclase type 8                                                  | <i>Anoplophora glabripennis</i> | 1924 | 2.00E-164 | 69.83 |
| PREDICTED: adenylate cyclase type 2 isoform X4                            | <i>Dendroctonus ponderosae</i>  | 2992 | 0         | 70.15 |
| iodotyrosine deiodinase 1 isoform X1                                      | <i>Anoplophora glabripennis</i> | 1025 | 8.00E-64  | 70.48 |
| cyclic AMP-responsive element-binding protein 3-like protein 1            | <i>Anoplophora glabripennis</i> | 2996 | 3.00E-55  | 72.26 |
| low-density lipoprotein receptor class A domain-containing protein 3-like | <i>Anoplophora glabripennis</i> | 2634 | 1.00E-54  | 71.91 |
| rutabaga                                                                  | <i>Tribolium castaneum</i>      | 7751 | 0         | 73.02 |
| Protein Wnt-2-like Protein                                                | <i>Tribolium castaneum</i>      | 2691 | 0         | 73.94 |
| transcription termination factor 2-like                                   | <i>Onthophagus taurus</i>       | 3187 | 2.00E-27  | 64.16 |

|                                                                                          |                                     |      |           |       |
|------------------------------------------------------------------------------------------|-------------------------------------|------|-----------|-------|
| cAMP-dependent protein kinase catalytic subunit alpha-like                               | <i>Leptinotarsa decemlineata</i>    | 770  | 3.00E-28  | 67.8  |
| PREDICTED: cAMP-dependent protein kinase catalytic subunit-like                          | <i>Agrilus planipennis</i>          | 1362 | 6.00E-103 | 70.96 |
| PREDICTED: endoplasmin                                                                   | <i>Linepithema humile</i>           | 2719 | 6.00E-174 | 67.15 |
| PREDICTED: LOW QUALITY PROTEIN: sodium/potassium-transporting ATPase subunit beta-2-like | <i>Aethina tumida</i>               | 2892 | 2.00E-25  | 67.53 |
| PREDICTED: probable phospholipid hydroperoxide glutathione peroxidase isoform X1         | <i>Aethina tumida</i>               | 1230 | 2.00E-57  | 70.85 |
| PREDICTED: adenylate cyclase type 3                                                      | <i>Tribolium castaneum</i>          | 2838 | 2.00E-174 | 71.98 |
| PREDICTED: guanine nucleotide-binding protein G                                          | <i>Tribolium castaneum</i>          | 4488 | 0         | 79.31 |
| PREDICTED: inositol 1,4,5-trisphosphate receptor isoform X3                              | <i>Tribolium castaneum</i>          | 8858 | 0         | 73.04 |
| <b>Thyroid hormone signaling pathway</b>                                                 |                                     |      |           |       |
| testis-specific actin                                                                    | <i>Rhipicephalus appendiculatus</i> | 298  | 8.00E-85  | 82.83 |
| actin, cytoplasmic A3a                                                                   | <i>Ceratitis capitata</i>           | 1195 | 0         | 81.67 |
| beta-actin                                                                               | <i>Tigriopus japonicus</i>          | 1771 | 9.00E-173 | 90.07 |

|                                                                                              |                                    |      |           |       |
|----------------------------------------------------------------------------------------------|------------------------------------|------|-----------|-------|
| PREDICTED: actin, cytoplasmic                                                                | <i>Tribolium castaneum</i>         | 667  | 1.00E-92  | 77.91 |
| mitogen-activated protein kinase 1                                                           | <i>Anoplophora glabripennis</i>    | 2301 | 0         | 77.13 |
| mediator of RNA polymerase II transcription subunit 13 isoform X3                            | <i>Anoplophora glabripennis</i>    | 7898 | 0         | 70.55 |
| PREDICTED: mediator of RNA polymerase II transcription subunit 16 isoform X1                 | <i>Tribolium castaneum</i>         | 3031 | 0         | 67.7  |
| PREDICTED: mediator of RNA polymerase II transcription subunit 17 isoform X2                 | <i>Tribolium castaneum</i>         | 2263 | 0         | 74.06 |
| PREDICTED: mediator of RNA polymerase II transcription subunit 24                            | <i>Tribolium castaneum</i>         | 3506 | 0         | 68.31 |
| solute carrier family 2, facilitated glucose transporter member 1                            | <i>Anoplophora glabripennis</i>    | 2568 | 2.00E-82  | 65.71 |
| PREDICTED: solute carrier family 2, facilitated glucose transporter member 3-like isoform X2 | <i>Ceratosolen solmsi marchali</i> | 845  | 3.00E-14  | 67.93 |
| histone deacetylase Rpd3 isoform X1                                                          | <i>Anoplophora glabripennis</i>    | 1908 | 0         | 78.01 |
| hypoxia-inducible factor 1-alpha isoform X2                                                  | <i>Anoplophora glabripennis</i>    | 2366 | 2.00E-146 | 70.95 |
| phosphatidylinositol 3-kinase regulatory subunit alpha isoform X2                            | <i>Anoplophora glabripennis</i>    | 8011 | 2.00E-69  | 64.9  |

|                                                                   |                                           |      |          |       |
|-------------------------------------------------------------------|-------------------------------------------|------|----------|-------|
| protein decapentaplegic                                           | <i>Anoplophora glabripennis</i>           | 3840 | 8.00E-52 | 74.03 |
| dual specificity mitogen-activated protein kinase kinase dSOR1    | <i>Anoplophora glabripennis</i>           | 2118 | 0        | 78.13 |
| transcriptional regulator Myc-1 isoform X2                        | <i>Anoplophora glabripennis</i>           | 3653 | 1.00E-24 | 74.18 |
| 6-phosphofructo-2-kinase/fructose-2,6-bisphosphatase 1 isoform X1 | <i>Anoplophora glabripennis</i>           | 3057 | 0        | 72.49 |
| RNA-binding protein 41                                            | <i>Harmonia axyridis</i>                  | 2116 | 5.00E-20 | 65.35 |
| ultraspiracle 2 isoform                                           | <i>Henosepilachna vigintioctopunctata</i> | 2221 | 0        | 99.56 |
| uncharacterized protein LOC111510921                              | <i>Leptinotarsa decemlineata</i>          | 1310 | 1.00E-17 | 74.34 |
| mediator of RNA polymerase II transcription subunit 30-like       | <i>Leptinotarsa decemlineata</i>          | 1185 | 1.00E-97 | 76.1  |
| RAC serine/threonine-protein kinase isoform X2                    | <i>Leptinotarsa decemlineata</i>          | 2024 | 0        | 73.09 |
| glucose transporter type 1 isoform X4                             | <i>Onthophagus taurus</i>                 | 2680 | 0        | 74.83 |
| ras-like GTP-binding protein RHO                                  | <i>Orbicella faveolata</i>                | 854  | 2.00E-10 | 83.08 |
| steroid receptor coactivator                                      | <i>Monochamus alternatus</i>              | 6138 | 0        | 67.81 |
| cAMP-dependent protein kinase catalytic subunit alpha-like        | <i>Leptinotarsa decemlineata</i>          | 770  | 3.00E-28 | 67.8  |

|                                                                                          |                                     |      |           |       |
|------------------------------------------------------------------------------------------|-------------------------------------|------|-----------|-------|
| PREDICTED: cAMP-dependent protein kinase catalytic subunit-like                          | <i>Agrilus planipennis</i>          | 1362 | 6.00E-103 | 70.96 |
| PREDICTED: LOW QUALITY PROTEIN: histone deacetylase 3-like                               | <i>Aethina tumida</i>               | 3494 | 0         | 77.72 |
| PREDICTED: LOW QUALITY PROTEIN: sodium/potassium-transporting ATPase subunit beta-2-like | <i>Aethina tumida</i>               | 2892 | 2.00E-25  | 67.53 |
| PREDICTED: 1-phosphatidylinositol 4,5-bisphosphate phosphodiesterase gamma-1             | <i>Tribolium castaneum</i>          | 4244 | 0         | 69.03 |
| PREDICTED: 3-phosphoinositide-dependent protein kinase 1                                 | <i>Tribolium castaneum</i>          | 1906 | 6.00E-27  | 67.01 |
| PREDICTED: GATA-binding factor A isoform X2                                              | <i>Tribolium castaneum</i>          | 2797 | 3.00E-109 | 72.24 |
| PREDICTED: transcription factor GATA-4 isoform X1                                        | <i>Tribolium castaneum</i>          | 2657 | 4.00E-88  | 80.34 |
| PREDICTED: GTP-binding protein Rheb homolog                                              | <i>Nicrophorus vespilloides</i>     | 2052 | 3.00E-97  | 76.4  |
| <b>Oxytocin signaling pathway</b>                                                        |                                     |      |           |       |
| testis-specific actin                                                                    | <i>Rhipicephalus appendiculatus</i> | 298  | 8.00E-85  | 82.83 |
| actin, cytoplasmic A3a                                                                   | <i>Ceratitis capitata</i>           | 1195 | 0         | 81.67 |
| beta-actin                                                                               | <i>Tigriopus japonicus</i>          | 1771 | 9.00E-173 | 90.07 |



|                                                                                        |                                  |      |           |       |
|----------------------------------------------------------------------------------------|----------------------------------|------|-----------|-------|
| PREDICTED: actin, cytoplasmic                                                          | <i>Tribolium castaneum</i>       | 667  | 1.00E-92  | 77.91 |
| PREDICTED: testis-specific muscle calcium channel subunit alpha-1 isoform X2           | <i>Nicrophorus vespilloides</i>  | 439  | 8.00E-53  | 75.83 |
| protein phosphatase 1 catalytic subunit, partial                                       | <i>Colaphellus bowringi</i>      | 1795 | 0         | 78.43 |
| PREDICTED: protein phosphatase 1 regulatory subunit 12B isoform X4                     | <i>Tribolium castaneum</i>       | 3143 | 0         | 69.69 |
| adenylate cyclase type 8                                                               | <i>Anoplophora glabripennis</i>  | 1924 | 2.00E-164 | 69.83 |
| PREDICTED: adenylate cyclase type 2 isoform X4                                         | <i>Dendroctonus ponderosae</i>   | 2992 | 0         | 70.15 |
| PREDICTED: adenylate cyclase type 3                                                    | <i>Tribolium castaneum</i>       | 2838 | 2.00E-174 | 71.98 |
| calcium-binding protein E63-1                                                          | <i>Anoplophora glabripennis</i>  | 615  | 8.00E-30  | 68.73 |
| PREDICTED: calcium/calmodulin-dependent protein kinase type 1                          | <i>Tribolium castaneum</i>       | 3330 | 0         | 79.48 |
| PREDICTED: calcium/calmodulin-dependent protein kinase type II alpha chain isoform X10 | <i>Tribolium castaneum</i>       | 1504 | 0         | 75.42 |
| cAMP-dependent protein kinase catalytic subunit alpha-like                             | <i>Leptinotarsa decemlineata</i> | 770  | 3.00E-28  | 67.8  |
| PREDICTED: cAMP-dependent protein kinase catalytic subunit-like                        | <i>Agrilus planipennis</i>       | 1362 | 6.00E-103 | 70.96 |

|                                                                   |                                  |       |           |       |
|-------------------------------------------------------------------|----------------------------------|-------|-----------|-------|
| G-protein alpha subunit                                           | <i>Lissorhoptrus oryzophilus</i> | 2446  | 0         | 79.53 |
| PREDICTED: G protein alpha i subunit                              | <i>Tribolium castaneum</i>       | 3106  | 0         | 73.79 |
| FK506-binding protein 59                                          | <i>Anoplophora glabripennis</i>  | 1584  | 2.00E-86  | 65.96 |
| titin                                                             | <i>Anoplophora glabripennis</i>  | 3672  | 0         | 71.6  |
| mitogen-activated protein kinase 1                                | <i>Anoplophora glabripennis</i>  | 2301  | 0         | 77.13 |
| dual specificity mitogen-activated protein kinase kinase<br>dSOR1 | <i>Anoplophora glabripennis</i>  | 2118  | 0         | 78.13 |
| 5'-AMP-activated protein kinase catalytic subunit<br>alpha-2      | <i>Dastarcus helophoroides</i>   | 2267  | 0         | 77.07 |
| hypothetical protein YQE_10269, partial                           | <i>Dendroctonus ponderosae</i>   | 3681  | 1.00E-118 | 71.4  |
| rutabaga                                                          | <i>Tribolium castaneum</i>       | 7751  | 0         | 73.02 |
| ryanodine receptor                                                | <i>Tribolium castaneum</i>       | 10129 | 0         | 74.66 |
| acid phosphatase, partial                                         | <i>Cryptolaemus montrouzieri</i> | 2868  | 0         | 87.05 |
| Calmodulin                                                        | <i>Stylophora pistillata</i>     | 879   | 6.00E-05  | 80.77 |
| PREDICTED: guanine nucleotide-binding protein G                   | <i>Tribolium castaneum</i>       | 4488  | 0         | 79.31 |
| PREDICTED: inositol 1,4,5-trisphosphate receptor<br>isoform X3    | <i>Tribolium castaneum</i>       | 8858  | 0         | 73.04 |

|                                                                              |                                  |      |           |       |
|------------------------------------------------------------------------------|----------------------------------|------|-----------|-------|
| PREDICTED: head-specific guanylate cyclase                                   | <i>Tribolium castaneum</i>       | 1161 | 2.00E-175 | 76.11 |
| <b>GnRH signaling pathway</b>                                                |                                  |      |           |       |
| testis-specific PREDICTED: muscle calcium channel subunit alpha-1 isoform X2 | <i>Nicrophorus vespilloides</i>  | 439  | 8.00E-53  | 75.83 |
| testis-specific PREDICTED: cell division control protein 42 homolog          | <i>Branchiostoma belcheri</i>    | 310  | 1.00E-30  | 80.42 |
| adenylate cyclase type 8                                                     | <i>Anoplophora glabripennis</i>  | 1924 | 2.00E-164 | 69.83 |
| PREDICTED: adenylate cyclase type 2 isoform X4                               | <i>Dendroctonus ponderosae</i>   | 2992 | 0         | 70.15 |
| PREDICTED: adenylate cyclase type 3                                          | <i>Tribolium castaneum</i>       | 2838 | 2.00E-174 | 71.98 |
| cAMP-dependent protein kinase catalytic subunit alpha-like                   | <i>Leptinotarsa decemlineata</i> | 770  | 3.00E-28  | 67.8  |
| PREDICTED: cAMP-dependent protein kinase catalytic subunit-like              | <i>Agrilus planipennis</i>       | 1362 | 6.00E-103 | 70.96 |
| matrix metalloproteinase 1 isoform 2 precursor                               | <i>Tribolium castaneum</i>       | 2544 | 7.00E-143 | 68.48 |
| PREDICTED: matrix metalloproteinase-14-like isoform X1                       | <i>Nicrophorus vespilloides</i>  | 1143 | 1.00E-24  | 71.07 |
| protein enhancer of sevenless 2B                                             | <i>Zootermopsis nevadensis</i>   | 1362 | 4.00E-36  | 67.17 |
| PREDICTED: protein enhancer of sevenless 2B                                  | <i>Tribolium castaneum</i>       | 636  | 4.00E-55  | 82.55 |

|                                                                                        |                                       |      |           |       |
|----------------------------------------------------------------------------------------|---------------------------------------|------|-----------|-------|
| calcium-binding protein E63-1                                                          | <i>Anoplophora glabripennis</i>       | 615  | 8.00E-30  | 68.73 |
| dual specificity mitogen-activated protein kinase kinase dSOR1                         | <i>Anoplophora glabripennis</i>       | 2118 | 0         | 78.13 |
| mitogen-activated protein kinase 1                                                     | <i>Anoplophora glabripennis</i>       | 2301 | 0         | 77.13 |
| rutabaga                                                                               | <i>Tribolium castaneum</i>            | 7751 | 0         | 73.02 |
| DNA excision repair protein ERCC-6-like isoform X3                                     | <i>Leptinotarsa decemlineata</i>      | 1619 | 1.00E-115 | 70.59 |
| protein son of sevenless isoform X2                                                    | <i>Leptinotarsa decemlineata</i>      | 5093 | 0         | 71.23 |
| Calmodulin                                                                             | <i>Stylophora pistillata</i>          | 879  | 6.00E-05  | 80.77 |
| PREDICTED: calcium/calmodulin-dependent protein kinase type II alpha chain isoform X10 | <i>Tribolium castaneum</i>            | 1504 | 0         | 75.42 |
| PREDICTED: guanine nucleotide-binding protein G                                        | <i>Tribolium castaneum</i>            | 4488 | 0         | 79.31 |
| PREDICTED: inositol 1,4,5-trisphosphate receptor isoform X3                            | <i>Tribolium castaneum</i>            | 8858 | 0         | 73.04 |
| PREDICTED: cdc42 homolog                                                               | <i>Tribolium castaneum</i>            | 1786 | 3.00E-138 | 78.99 |
| <b>Apoptosis</b>                                                                       |                                       |      |           |       |
| testis-specific probable multidrug resistance-associated protein lethal                | <i>Diabrotica virgifera virgifera</i> | 929  | 6.00E-39  | 73.18 |

|                                                                   |                                     |      |           |       |
|-------------------------------------------------------------------|-------------------------------------|------|-----------|-------|
| testis-specific Cathepsin L1 precursor                            | <i>Caligus clemensi</i>             | 385  | 1.00E-31  | 73.61 |
| testis-specific PREDICTED: cathepsin L1-like                      | <i>Aethina tumida</i>               | 1122 | 5.00E-15  | 67.32 |
| testis-specific actin                                             | <i>Rhipicephalus appendiculatus</i> | 298  | 8.00E-85  | 82.83 |
| actin, cytoplasmic A3a                                            | <i>Ceratitidis capitata</i>         | 1195 | 0         | 81.67 |
| beta-actin                                                        | <i>Tigriopus japonicus</i>          | 1771 | 9.00E-173 | 90.07 |
| PREDICTED: actin, cytoplasmic                                     | <i>Tribolium castaneum</i>          | 667  | 1.00E-92  | 77.91 |
| dual specificity mitogen-activated protein kinase kinase dSOR1    | <i>Anoplophora glabripennis</i>     | 2118 | 0         | 78.13 |
| mitogen-activated protein kinase 1                                | <i>Anoplophora glabripennis</i>     | 2301 | 0         | 77.13 |
| tubulin alpha-4 chain-like                                        | <i>Anoplophora glabripennis</i>     | 1526 | 0         | 74.4  |
| phosphatidylinositol 3-kinase regulatory subunit alpha isoform X2 | <i>Anoplophora glabripennis</i>     | 8011 | 2.00E-69  | 64.9  |
| RNA-binding protein 41                                            | <i>Harmonia axyridis</i>            | 2116 | 5.00E-20  | 65.35 |
| RAC serine/threonine-protein kinase isoform X2                    | <i>Leptinotarsa decemlineata</i>    | 2024 | 0         | 73.09 |
| growth arrest and DNA damage-inducible protein GADD45 alpha       | <i>Leptinotarsa decemlineata</i>    | 1125 | 2.00E-31  | 70.63 |
| serine protease HTRA2, mitochondrial-like                         | <i>Leptinotarsa decemlineata</i>    | 1496 | 3.00E-31  | 72.62 |

|                                                                             |                                           |      |          |       |
|-----------------------------------------------------------------------------|-------------------------------------------|------|----------|-------|
| PREDICTED: 3-phosphoinositide-dependent protein kinase 1                    | <i>Tribolium castaneum</i>                | 1906 | 6.00E-27 | 67.01 |
| PREDICTED: nuclear factor NF-kappa-B p110 subunit isoform X1                | <i>Tribolium castaneum</i>                | 3301 | 3.00E-78 | 68.03 |
| PREDICTED: inositol 1,4,5-trisphosphate receptor isoform X3                 | <i>Tribolium castaneum</i>                | 8858 | 0        | 73.04 |
| <b>Apoptosis - fly</b>                                                      |                                           |      |          |       |
| raf homolog serine/threonine-protein kinase phl                             | <i>Anoplophora glabripennis</i>           | 3433 | 0        | 73.44 |
| ultraspiracle 2 isoform                                                     | <i>Henosepilachna vigintioctopunctata</i> | 2221 | 0        | 99.56 |
| mitogen-activated protein kinase 1                                          | <i>Anoplophora glabripennis</i>           | 2301 | 0        | 77.13 |
| PREDICTED: mitogen-activated protein kinase kinase kinase 7-like isoform X1 | <i>Agrilus planipennis</i>                | 1968 | 1.00E-74 | 69.19 |
| serine protease HTRA2, mitochondrial-like                                   | <i>Leptinotarsa decemlineata</i>          | 1496 | 3.00E-31 | 72.62 |
| PREDICTED: serine/threonine-protein kinase 3 isoform X1                     | <i>Tribolium castaneum</i>                | 4285 | 0        | 73.78 |
| <b>Apoptosis - multiple species</b>                                         |                                           |      |          |       |
| PREDICTED: S-phase kinase-associated protein 1 isoform X1                   | <i>Ceratosolen solmsi marchali</i>        | 845  | 3.00E-27 | 66.59 |

**Steroid hormone biosynthesis**

|                                                                    |                                  |      |          |       |
|--------------------------------------------------------------------|----------------------------------|------|----------|-------|
| testis-specific UDP-glucuronosyltransferase 2B16-like isoform X1   | <i>Anoplophora glabripennis</i>  | 629  | 3.00E-35 | 69.8  |
| testis-specific PREDICTED:<br>UDP-glucuronosyltransferase 2B2-like | <i>Nicrophorus vespilloides</i>  | 477  | 1.00E-06 | 80    |
| uncharacterized protein LOC108903775                               | <i>Anoplophora glabripennis</i>  | 1273 | 9.00E-14 | 67.77 |
| uncharacterized protein LOC108904558                               | <i>Anoplophora glabripennis</i>  | 1755 | 4.00E-07 | 77.11 |
| uncharacterized protein LOC111515682                               | <i>Leptinotarsa decemlineata</i> | 1338 | 2.00E-45 | 70.79 |
| hypothetical protein D910_12170                                    | <i>Dendroctonus ponderosae</i>   | 1589 | 7.00E-50 | 69.23 |
| hypothetical protein TcasGA2_TC012282                              | <i>Tribolium castaneum</i>       | 1657 | 5.00E-14 | 65.04 |
| UDP-glucuronosyltransferase 2B19 isoform X1                        | <i>Anoplophora glabripennis</i>  | 1995 | 5.00E-64 | 65.95 |
| UDP-glucuronosyltransferase 2A3-like isoform X1                    | <i>Leptinotarsa decemlineata</i> | 1930 | 1.00E-11 | 70.99 |
| very-long-chain 3-oxoacyl-CoA reductase-B                          | <i>Leptinotarsa decemlineata</i> | 1283 | 1.00E-48 | 65.71 |
| PREDICTED: UDP-glucuronosyltransferase 1-1-like                    | <i>Agrilus planipennis</i>       | 660  | 1.00E-05 | 81.13 |
| PREDICTED: UDP-glucuronosyltransferase 1-7 isoform X3              | <i>Tribolium castaneum</i>       | 1323 | 4.00E-40 | 72.39 |
| PREDICTED: UDP-glucuronosyltransferase 1-7C                        | <i>Tribolium castaneum</i>       | 834  | 8.00E-16 | 70.21 |

isoform X4

|                                                                       |                                |      |          |       |
|-----------------------------------------------------------------------|--------------------------------|------|----------|-------|
| PREDICTED: UDP-glucuronosyltransferase 2B7-like                       | <i>Aethina tumida</i>          | 1878 | 3.00E-21 | 67.82 |
| PREDICTED: UDP-glucuronosyltransferase 2B7 isoform X2                 | <i>Tribolium castaneum</i>     | 1670 | 6.00E-13 | 68.69 |
| PREDICTED: UDP-glucuronosyltransferase 2B9                            | <i>Tribolium castaneum</i>     | 1250 | 2.00E-05 | 81.82 |
| PREDICTED: UDP-glucuronosyltransferase 2B14                           | <i>Tribolium castaneum</i>     | 1913 | 8.00E-19 | 76.34 |
| PREDICTED: UDP-glucuronosyltransferase 2B15-like                      | <i>Agrilus planipennis</i>     | 417  | 1.00E-11 | 76.29 |
| PREDICTED: UDP-glucuronosyltransferase 2B17-like                      | <i>Dendroctonus ponderosae</i> | 483  | 4.00E-07 | 71.3  |
| PREDICTED: UDP-glucuronosyltransferase 2C1-like                       | <i>Tribolium castaneum</i>     | 1523 | 7.00E-26 | 72.35 |
| PREDICTED: 2-hydroxyacylsphingosine 1-beta-galactosyltransferase-like | <i>Tribolium castaneum</i>     | 1795 | 1.00E-29 | 69.45 |

### Homologous recombination

|                                                                 |                             |     |           |       |
|-----------------------------------------------------------------|-----------------------------|-----|-----------|-------|
| testis-specific PREDICTED: uncharacterized protein LOC106134883 | <i>Amyelois transitella</i> | 414 | 1.00E-135 | 85.82 |
| testis-specific PREDICTED: uncharacterized protein LOC106140328 | <i>Amyelois transitella</i> | 271 | 6.00E-73  | 82.72 |
| testis-specific PREDICTED: uncharacterized protein LOC109038256 | <i>Bemisia tabaci</i>       | 336 | 6.00E-10  | 71.9  |



|                                                                     |                                  |      |          |       |
|---------------------------------------------------------------------|----------------------------------|------|----------|-------|
| DNA repair protein RAD50 isoform X1                                 | <i>Anoplophora glabripennis</i>  | 4231 | 7.00E-34 | 68.14 |
| DNA repair protein RAD51 homolog 1                                  | <i>Leptinotarsa decemlineata</i> | 1294 | 0        | 76.06 |
| DNA repair and recombination protein RAD54-like                     | <i>Anoplophora glabripennis</i>  | 429  | 6.00E-29 | 72.73 |
| DNA topoisomerase 3-beta-1                                          | <i>Anoplophora glabripennis</i>  | 3145 | 0        | 73.66 |
| DNA polymerase delta small subunit                                  | <i>Anoplophora glabripennis</i>  | 1805 | 2.00E-74 | 66.88 |
| BRISC and BRCA1-A complex member 2                                  | <i>Anoplophora glabripennis</i>  | 2183 | 8.00E-24 | 66.28 |
| breast cancer type 2 susceptibility protein-like isoform X2         | <i>Anoplophora glabripennis</i>  | 4335 | 1.00E-24 | 67.31 |
| uncharacterized protein LOC111615589                                | <i>Centruroides sculpturatus</i> | 1093 | 1.00E-05 | 68.66 |
| PREDICTED: uncharacterized protein LOC106131883 isoform X1          | <i>Amyelois transitella</i>      | 470  | 4.00E-28 | 69.23 |
| PREDICTED: crossover junction endonuclease EME1                     | <i>Agrilus planipennis</i>       | 1985 | 2.00E-16 | 66.83 |
| PREDICTED: single-stranded DNA-binding protein, mitochondrial       | <i>Tribolium castaneum</i>       | 1323 | 4.00E-59 | 76.23 |
| <b>MAPK signaling pathway</b>                                       |                                  |      |          |       |
| testis-specific mitogen-activated protein kinase kinase kinase 13-A | <i>Leptinotarsa decemlineata</i> | 817  | 5.00E-07 | 72.73 |

|                                                                              |                                  |      |           |       |
|------------------------------------------------------------------------------|----------------------------------|------|-----------|-------|
| testis-specific heat shock protein cognate 70-6                              | <i>Laodelphax striatella</i>     | 367  | 3.00E-13  | 73.28 |
| testis-specific PREDICTED: cell division control protein 42 homolog          | <i>Branchiostoma belcheri</i>    | 310  | 1.00E-30  | 80.42 |
| testis-specific PREDICTED: TGF-beta receptor type-1 isoform X3               | <i>Nicrophorus vespilloides</i>  | 353  | 2.00E-08  | 72.13 |
| testis-specific PREDICTED: muscle calcium channel subunit alpha-1 isoform X2 | <i>Nicrophorus vespilloides</i>  | 439  | 8.00E-53  | 75.83 |
| heat shock protein 68                                                        | <i>Harmonia axyridis</i>         | 2242 | 0         | 78.25 |
| heat shock protein 70                                                        | <i>Harmonia axyridis</i>         | 3004 | 0         | 73.57 |
| heat shock protein 68-like                                                   | <i>Leptinotarsa decemlineata</i> | 1720 | 0         | 75.03 |
| PREDICTED: heat shock 70 kDa protein cognate 2                               | <i>Tribolium castaneum</i>       | 744  | 8.00E-141 | 78.17 |
| PREDICTED: heat shock 70 kDa protein cognate 4 isoform X2                    | <i>Megachile rotundata</i>       | 312  | 3.00E-23  | 85.11 |
| cAMP-dependent protein kinase catalytic subunit alpha-like                   | <i>Leptinotarsa decemlineata</i> | 770  | 1.00E-28  | 67.8  |
| PREDICTED: cAMP-dependent protein kinase catalytic subunit-like              | <i>Agrilus planipennis</i>       | 1362 | 6.00E-103 | 70.96 |
| mitogen-activated protein kinase 1                                           | <i>Anoplophora glabripennis</i>  | 2301 | 0         | 77.13 |

|                                                                             |                                  |      |           |       |
|-----------------------------------------------------------------------------|----------------------------------|------|-----------|-------|
| PREDICTED: mitogen-activated protein kinase kinase kinase 7-like isoform X1 | <i>Agrilus planipennis</i>       | 1968 | 1.00E-74  | 69.19 |
| dual specificity mitogen-activated protein kinase kinase dSOR1              | <i>Anoplophora glabripennis</i>  | 2118 | 0         | 78.13 |
| PREDICTED: dual specificity protein phosphatase 3                           | <i>Tribolium castaneum</i>       | 914  | 8.00E-53  | 68.37 |
| MAP kinase-activated protein kinase 2                                       | <i>Anoplophora glabripennis</i>  | 2384 | 0         | 77.83 |
| MAP kinase-interacting serine/threonine-protein kinase 1                    | <i>Anoplophora glabripennis</i>  | 880  | 1.00E-117 | 76.35 |
| TGF-beta-activated kinase 1 and MAP3K7-binding protein 1                    | <i>Anoplophora glabripennis</i>  | 3006 | 8.00E-57  | 69.07 |
| transcriptional regulator Myc-1 isoform X2                                  | <i>Anoplophora glabripennis</i>  | 3653 | 1.00E-24  | 74.18 |
| ras-related C3 botulinum toxin substrate 1                                  | <i>Anoplophora glabripennis</i>  | 2805 | 4.00E-136 | 78.21 |
| raf homolog serine/threonine-protein kinase phl                             | <i>Anoplophora glabripennis</i>  | 3433 | 0         | 73.44 |
| ribosomal protein S6 kinase 2 beta isoform X2                               | <i>Anoplophora glabripennis</i>  | 3142 | 0         | 71.32 |
| DNA excision repair protein ERCC-6-like isoform X3                          | <i>Leptinotarsa decemlineata</i> | 1619 | 1.00E-115 | 70.59 |
| growth arrest and DNA damage-inducible protein GADD45 alpha                 | <i>Leptinotarsa decemlineata</i> | 1125 | 2.00E-31  | 70.63 |
| RAC serine/threonine-protein kinase isoform X2                              | <i>Leptinotarsa decemlineata</i> | 2024 | 0         | 73.09 |

|                                                                         |                                  |      |           |       |
|-------------------------------------------------------------------------|----------------------------------|------|-----------|-------|
| protein son of sevenless isoform X2                                     | <i>Leptinotarsa decemlineata</i> | 5093 | 0         | 71.23 |
| protein enhancer of sevenless 2B                                        | <i>Zootermopsis nevadensis</i>   | 1362 | 4.00E-36  | 67.17 |
| RNA-binding protein 41                                                  | <i>Harmonia axyridis</i>         | 2116 | 5.00E-20  | 65.35 |
| PREDICTED: LOW QUALITY PROTEIN: ras<br>GTPase-activating protein 1-like | <i>Aethina tumida</i>            | 4518 | 0         | 74.04 |
| PREDICTED: LOW QUALITY PROTEIN: heat shock<br>protein 68-like           | <i>Aethina tumida</i>            | 1043 | 7.00E-146 | 73.66 |
| PREDICTED: zinc finger protein 2 homolog isoform X1                     | <i>Tribolium castaneum</i>       | 4028 | 2.00E-67  | 74.49 |
| PREDICTED: serine/threonine-protein kinase mos                          | <i>Tribolium castaneum</i>       | 1708 | 7.00E-13  | 66.56 |
| PREDICTED: serine/threonine-protein kinase 3 isoform<br>X1              | <i>Tribolium castaneum</i>       | 4285 | 0         | 73.78 |
| PREDICTED: serine/threonine-protein kinase NLK<br>isoform X1            | <i>Tribolium castaneum</i>       | 3626 | 0         | 78.33 |
| PREDICTED: serine/threonine-protein phosphatase 5                       | <i>Tribolium castaneum</i>       | 1774 | 0         | 71.26 |
| PREDICTED: protein max isoform X3                                       | <i>Tribolium castaneum</i>       | 1363 | 5.00E-70  | 73.66 |
| PREDICTED: protein enhancer of sevenless 2B                             | <i>Tribolium castaneum</i>       | 636  | 4.00E-55  | 82.55 |
| PREDICTED: adapter molecule Crk                                         | <i>Tribolium castaneum</i>       | 1329 | 2.00E-128 | 72.72 |

|                                                                           |                                  |      |           |       |
|---------------------------------------------------------------------------|----------------------------------|------|-----------|-------|
| PREDICTED: ras-like protein 3                                             | <i>Tribolium castaneum</i>       | 4357 | 0         | 78.58 |
| PREDICTED: nuclear factor NF-kappa-B p110 subunit isoform X1              | <i>Tribolium castaneum</i>       | 3301 | 3.00E-78  | 68.03 |
| PREDICTED: cdc42 homolog                                                  | <i>Tribolium castaneum</i>       | 1786 | 3.00E-138 | 78.99 |
| PREDICTED: protein phosphatase 1A                                         | <i>Tribolium castaneum</i>       | 4182 | 3.00E-168 | 74.23 |
| PREDICTED: fizzy-related protein homolog                                  | <i>Tribolium castaneum</i>       | 3134 | 0         | 73.3  |
| <b>MAPK signaling pathway - fly</b>                                       |                                  |      |           |       |
| testis-specific PREDICTED: leucine-rich repeat-containing protein 24-like | <i>Nicrophorus vespilloides</i>  | 519  | 2.00E-11  | 72.44 |
| sprouty                                                                   | <i>Harmonia axyridis</i>         | 2358 | 0         | 82.6  |
| <i>Agrilus planipennis</i>                                                | <i>Agrilus planipennis</i>       | 2005 | 0         | 79.81 |
| protein trunk                                                             | <i>Anoplophora glabripennis</i>  | 1337 | 2.00E-04  | 67.72 |
| protein decapentaplegic                                                   | <i>Anoplophora glabripennis</i>  | 3840 | 8.00E-52  | 74.03 |
| protein C-ets-2 isoform X1                                                | <i>Anoplophora glabripennis</i>  | 3507 | 0         | 70.56 |
| protein enhancer of sevenless 2B                                          | <i>Zootermopsis nevadensis</i>   | 1362 | 4.00E-36  | 67.17 |
| protein son of sevenless isoform X2                                       | <i>Leptinotarsa decemlineata</i> | 5093 | 0         | 71.23 |
| raf homolog serine/threonine-protein kinase phl                           | <i>Anoplophora glabripennis</i>  | 3433 | 0         | 73.44 |

|                                                                        |                                  |      |           |       |
|------------------------------------------------------------------------|----------------------------------|------|-----------|-------|
| ras-related C3 botulinum toxin substrate 1                             | <i>Anoplophora glabripennis</i>  | 2805 | 4.00E-136 | 78.21 |
| mitogen-activated protein kinase 1                                     | <i>Anoplophora glabripennis</i>  | 2301 | 0         | 77.13 |
| PREDICTED: mitogen-activated protein kinase kinase 7-like isoform X1   | <i>Agrilus planipennis</i>       | 1968 | 1.00E-74  | 69.19 |
| dual specificity mitogen-activated protein kinase kinase dSOR1         | <i>Anoplophora glabripennis</i>  | 2118 | 0         | 78.13 |
| E3 ubiquitin-protein ligase SIAH1-like                                 | <i>Anoplophora glabripennis</i>  | 1012 | 2.00E-15  | 65.37 |
| receptor tyrosine kinase Torso-like protein                            | <i>Tribolium castaneum</i>       | 944  | 5.00E-05  | 72.63 |
| uncharacterized protein LOC111504284                                   | <i>Leptinotarsa decemlineata</i> | 3305 | 4.00E-154 | 70.35 |
| serine/threonine-protein phosphatase 2A catalytic subunit beta isoform | <i>Leptinotarsa decemlineata</i> | 2785 | 0         | 76.76 |
| DNA excision repair protein ERCC-6-like isoform X3                     | <i>Leptinotarsa decemlineata</i> | 1619 | 1.00E-115 | 70.59 |
| PREDICTED: E3 ubiquitin-protein ligase SIAH1-like                      | <i>Aethina tumida</i>            | 2663 | 4.00E-172 | 77.66 |
| PREDICTED: LOW QUALITY PROTEIN: ras GTPase-activating protein 1-like   | <i>Aethina tumida</i>            | 4518 | 0         | 74.04 |
| PREDICTED: LOW QUALITY PROTEIN: exportin-1                             | <i>Aethina tumida</i>            | 4508 | 0         | 71.34 |
| PREDICTED: 14-3-3 protein zeta isoform X3                              | <i>Dendroctonus ponderosae</i>   | 1175 | 2.00E-68  | 80.07 |

|                                                                                             |                                  |      |           |       |
|---------------------------------------------------------------------------------------------|----------------------------------|------|-----------|-------|
| PREDICTED: protein phosphatase 1A                                                           | <i>Tribolium castaneum</i>       | 4182 | 3.00E-168 | 74.23 |
| PREDICTED: protein groucho isoform X4                                                       | <i>Tribolium castaneum</i>       | 2750 | 0         | 72.27 |
| PREDICTED: tyrosine-protein kinase Btk29A isoform X1                                        | <i>Tribolium castaneum</i>       | 2685 | 0         | 76.34 |
| PREDICTED: SHC-transforming protein 1                                                       | <i>Tribolium castaneum</i>       | 5140 | 4.00E-130 | 69.36 |
| PREDICTED: modulator of activity of ets isoform X1                                          | <i>Tribolium castaneum</i>       | 1018 | 3.00E-15  | 68.3  |
| PREDICTED: homeobox protein prospero isoform X2                                             | <i>Tribolium castaneum</i>       | 3643 | 0         | 72.74 |
| PREDICTED: zinc finger protein 2 homolog isoform X1                                         | <i>Tribolium castaneum</i>       | 4028 | 2.00E-67  | 74.49 |
| <b>Ras signaling pathway</b>                                                                |                                  |      |           |       |
| testis-specific PREDICTED: LOW QUALITY PROTEIN: protein still life, isoform SIF type 1-like | <i>Aethina tumida</i>            | 2389 | 2.00E-29  | 74.07 |
| testis-specific PREDICTED: protein still life, isoform SIF type 1 isoform X13               | <i>Tribolium castaneum</i>       | 472  | 5.00E-98  | 76.91 |
| testis-specific PREDICTED: cell division control protein 42 homolog                         | <i>Branchiostoma belcheri</i>    | 310  | 1.00E-30  | 80.42 |
| cAMP-dependent protein kinase catalytic subunit alpha-like                                  | <i>Leptinotarsa decemlineata</i> | 770  | 3.00E-28  | 67.8  |
| PREDICTED: cAMP-dependent protein kinase catalytic subunit-like                             | <i>Agrilus planipennis</i>       | 1362 | 6.00E-103 | 70.96 |

|                                                                   |                                 |      |           |       |
|-------------------------------------------------------------------|---------------------------------|------|-----------|-------|
| ras-like GTP-binding protein RHO                                  | <i>Orbicella faveolata</i>      | 854  | 2.00E-10  | 83.08 |
| PREDICTED: ras-like protein 2                                     | <i>Harmonia axyridis</i>        | 430  | 0.008     | 92.59 |
| PREDICTED: ras-like protein 3                                     | <i>Tribolium castaneum</i>      | 4357 | 0         | 78.58 |
| ras-related C3 botulinum toxin substrate 1                        | <i>Anoplophora glabripennis</i> | 2805 | 4.00E-136 | 78.21 |
| PREDICTED: ras-related protein Ral-a                              | <i>Tribolium castaneum</i>      | 2275 | 3.00E-100 | 73.32 |
| mitogen-activated protein kinase 1                                | <i>Anoplophora glabripennis</i> | 2301 | 0         | 77.13 |
| 5-hydroxytryptamine receptor 1-like                               | <i>Anoplophora glabripennis</i> | 2157 | 0         | 73.52 |
| leucine-rich repeat protein soc-2 homolog                         | <i>Anoplophora glabripennis</i> | 3775 | 0         | 71.46 |
| protein C-ets-2 isoform X1                                        | <i>Anoplophora glabripennis</i> | 3507 | 0         | 70.56 |
| dual specificity mitogen-activated protein kinase kinase dSOR1    | <i>Anoplophora glabripennis</i> | 2118 | 0         | 78.13 |
| vascular endothelial growth factor receptor 1 isoform X4          | <i>Anoplophora glabripennis</i> | 3248 | 1.00E-42  | 73.52 |
| phosphatidylinositol 3-kinase regulatory subunit alpha isoform X2 | <i>Anoplophora glabripennis</i> | 8011 | 2.00E-69  | 64.9  |
| BRCA1-associated protein isoform X2                               | <i>Anoplophora glabripennis</i> | 2261 | 2.00E-165 | 69.74 |
| insulin-like receptor                                             | <i>Anoplophora glabripennis</i> | 7550 | 9.00E-143 | 72.23 |
| calcium-binding protein E63-1                                     | <i>Anoplophora glabripennis</i> | 615  | 8.00E-30  | 68.73 |



|                                                                      |                                  |      |           |       |
|----------------------------------------------------------------------|----------------------------------|------|-----------|-------|
| RNA-binding protein 41                                               | <i>Harmonia axyridis</i>         | 2116 | 5.00E-20  | 65.35 |
| protein son of sevenless isoform X2                                  | <i>Leptinotarsa decemlineata</i> | 5093 | 0         | 71.23 |
| RAC serine/threonine-protein kinase isoform X2                       | <i>Leptinotarsa decemlineata</i> | 2024 | 0         | 73.09 |
| Calmodulin                                                           | <i>Stylophora pistillata</i>     | 879  | 6.00E-05  | 80.77 |
| PREDICTED: vascular endothelial growth factor receptor 1 isoform X1  | <i>Tribolium castaneum</i>       | 1926 | 2.00E-21  | 66.57 |
| PREDICTED: vascular endothelial growth factor receptor 1 isoform X2  | <i>Megachile rotundata</i>       | 465  | 3.00E-20  | 71.96 |
| PREDICTED: LOW QUALITY PROTEIN: ras GTPase-activating protein 1-like | <i>Aethina tumida</i>            | 4518 | 0         | 74.04 |
| PREDICTED: protein enhancer of sevenless 2B                          | <i>Tribolium castaneum</i>       | 636  | 4.00E-55  | 82.55 |
| PREDICTED: ADP-ribosylation factor 6                                 | <i>Tribolium castaneum</i>       | 3182 | 4.00E-82  | 72.8  |
| PREDICTED: nuclear factor NF-kappa-B p110 subunit isoform X1         | <i>Tribolium castaneum</i>       | 3301 | 3.00E-78  | 68.03 |
| PREDICTED: cdc42 homolog                                             | <i>Tribolium castaneum</i>       | 1786 | 3.00E-138 | 78.99 |
| PREDICTED: glutamate [NMDA] receptor subunit 1 isoform X2            | <i>Tribolium castaneum</i>       | 2932 | 0         | 71.43 |
| PREDICTED: 1-phosphatidylinositol 4,5-bisphosphate                   | <i>Tribolium castaneum</i>       | 4244 | 0         | 69.03 |

phosphodiesterase gamma-1

|                                                              |                            |      |           |       |
|--------------------------------------------------------------|----------------------------|------|-----------|-------|
| PREDICTED: SHC-transforming protein 1                        | <i>Tribolium castaneum</i> | 5140 | 4.00E-130 | 69.36 |
| PREDICTED: zinc finger protein 2 homolog isoform X1          | <i>Tribolium castaneum</i> | 4028 | 2.00E-67  | 74.49 |
| PREDICTED: group XIIA secretory phospholipase A2             | <i>Aethina tumida</i>      | 1472 | 2.00E-85  | 71.66 |
| PREDICTED: ralA-binding protein 1                            | <i>Aethina tumida</i>      | 2419 | 1.00E-127 | 69.26 |
| PREDICTED: embryonic polarity protein dorsal-like isoform X3 | <i>Agrilus planipennis</i> | 3037 | 3.00E-111 | 71.07 |

### Cell cycle

|                                                              |                                 |      |           |       |
|--------------------------------------------------------------|---------------------------------|------|-----------|-------|
| cell division cycle protein 16 homolog                       | <i>Anoplophora glabripennis</i> | 1855 | 5.00E-139 | 75.56 |
| cell division cycle protein 23 homolog                       | <i>Anoplophora glabripennis</i> | 1849 | 0         | 73.85 |
| cell division cycle protein 27 homolog                       | <i>Anoplophora glabripennis</i> | 3090 | 5.00E-91  | 69.22 |
| mitotic checkpoint serine/threonine-protein kinase BUB1 beta | <i>Anoplophora glabripennis</i> | 3658 | 2.00E-98  | 73.21 |
| mitotic spindle assembly checkpoint protein MAD1-like        | <i>Anoplophora glabripennis</i> | 2604 | 3.00E-24  | 64.24 |
| 14-3-3 protein epsilon                                       | <i>Zootermopsis nevadensis</i>  | 1038 | 7.00E-146 | 75.53 |
| 14-3-3 protein zeta isoform X1                               | <i>Anoplophora glabripennis</i> | 2161 | 0         | 83.52 |
| PREDICTED: 14-3-3 protein zeta isoform X3                    | <i>Dendroctonus ponderosae</i>  | 1175 | 2.00E-68  | 80.07 |

|                                                             |                                  |      |           |       |
|-------------------------------------------------------------|----------------------------------|------|-----------|-------|
| anaphase-promoting complex subunit 4                        | <i>Anoplophora glabripennis</i>  | 2666 | 5.00E-53  | 65.92 |
| anaphase-promoting complex subunit 10                       | <i>Leptinotarsa decemlineata</i> | 1072 | 2.00E-137 | 80.87 |
| PREDICTED: anaphase-promoting complex subunit 2             | <i>Tribolium castaneum</i>       | 3131 | 2.00E-169 | 68.43 |
| PREDICTED: cell division cycle protein 16 homolog           | <i>Aethina tumida</i>            | 689  | 2.00E-37  | 71.72 |
| structural maintenance of chromosomes protein 3             | <i>Anoplophora glabripennis</i>  | 3851 | 0         | 75.59 |
| PREDICTED: structural maintenance of chromosomes protein 1A | <i>Tribolium castaneum</i>       | 4067 | 0         | 74.69 |
| dual specificity protein phosphatase CDC14B-like            | <i>Anoplophora glabripennis</i>  | 2133 | 4.00E-116 | 69.17 |
| histone deacetylase Rpd3 isoform X1                         | <i>Anoplophora glabripennis</i>  | 1908 | 0         | 78.01 |
| transcriptional regulator Myc-1 isoform X2                  | <i>Anoplophora glabripennis</i>  | 3653 | 1.00E-24  | 74.18 |
| probable ATP-dependent RNA helicase DDX27                   | <i>Anoplophora glabripennis</i>  | 2782 | 0         | 70.33 |
| protein cortex-like                                         | <i>Anoplophora glabripennis</i>  | 1877 | 0.11      | 95.83 |
| growth arrest and DNA damage-inducible protein GADD45 alpha | <i>Leptinotarsa decemlineata</i> | 1125 | 2.00E-31  | 70.63 |
| RING-box protein 1A                                         | <i>Onthophagus taurus</i>        | 588  | 6.00E-89  | 81.16 |
| PREDICTED: G1/S-specific cyclin-D3-like                     | <i>Aethina tumida</i>            | 1476 | 3.00E-44  | 68    |
| PREDICTED: cyclin-dependent kinase 2-like                   | <i>Aethina tumida</i>            | 1454 | 2.00E-141 | 72.06 |

|                                                            |                                    |      |          |       |
|------------------------------------------------------------|------------------------------------|------|----------|-------|
| PREDICTED: S-phase kinase-associated protein 1             | <i>Agrilus planipennis</i>         | 305  | 6.00E-51 | 78.81 |
| PREDICTED: S-phase kinase-associated protein 1 isoform X1  | <i>Ceratosolen solmsi marchali</i> | 845  | 3.00E-27 | 66.59 |
| PREDICTED: cullin-1                                        | <i>Tribolium castaneum</i>         | 3231 | 0        | 74.24 |
| <b>Insect hormone biosynthesis</b>                         |                                    |      |          |       |
| testis-specific aldehyde dehydrogenase, mitochondrial-like | <i>Mizuhopecten yessoensis</i>     | 331  | 2.00E-41 | 71.3  |
| testis-specific PREDICTED: cytochrome P450 307a1-like      | <i>Agrilus planipennis</i>         | 465  | 1.00E-22 | 69.93 |

---

**Table S2. The C<sub>t</sub> values of 29 tested unigenes for RT-qPCR analysis**

| Gene                         | Testis (C <sub>t</sub> ± SE) | Ovary (C <sub>t</sub> ± SE) |
|------------------------------|------------------------------|-----------------------------|
| Testis-up-regulated unigenes |                              |                             |
| TRINITY_DN36203_c0_g1        | 26.9213 ± 0.0269             | --                          |
| TRINITY_DN36769_c0_g1        | 28.7448 ± 0.2658             | --                          |
| TRINITY_DN32154_c0_g1        | 27.8281 ± 0.1527             | --                          |
| TRINITY_DN34503_c0_g1        | 27.4787 ± 0.2203             | --                          |
| TRINITY_DN3474_c0_g1         | 27.3564 ± 0.0576             | --                          |
| TRINITY_DN34469_c0_g1        | 26.2939 ± 0.2123             | --                          |
| TRINITY_DN38009_c0_g1        | 27.3262 ± 0.1442             | --                          |
| TRINITY_DN37061_c0_g1        | 27.3928 ± 0.1300             | --                          |
| TRINITY_DN38116_c0_g1        | 24.1200 ± 0.0146             | --                          |
| TRINITY_DN39900_c0_g1        | 27.7148 ± 0.1271             | --                          |
| TRINITY_DN36997_c0_g1        | 31.0963 ± 0.1055             | --                          |
| TRINITY_DN36816_c1_g1        | 29.6950 ± 0.1461             | --                          |
| TRINITY_DN40076_c0_g1        | 29.1139 ± 0.1323             | --                          |
| TRINITY_DN37352_c0_g2        | 26.2067 ± 0.0948             | --                          |
| TRINITY_DN28048_c0_g1        | 22.8569 ± 0.0961             | 37.2913 ± 0.1161            |
| TRINITY_DN37903_c0_g1        | 25.0676 ± 0.1302             | --                          |
| Ovary-up-regulated unigenes  |                              |                             |
| TRINITY_DN35620_c0_g2        | --                           | 27.7807 ± 0.2636            |
| TRINITY_DN37242_c1_g2        | --                           | 30.9480 ± 0.3723            |
| TRINITY_DN37127_c1_g1        | --                           | 31.0885 ± 0.1871            |
| TRINITY_DN31659_c0_g1        | --                           | 30.9607 ± 0.2123            |
| TRINITY_DN33161_c0_g1        | --                           | 30.2988 ± 0.2153            |

|                       |                  |                  |
|-----------------------|------------------|------------------|
| TRINITY_DN35988_c5_g2 | --               | 31.1437 ± 0.1396 |
| TRINITY_DN36847_c0_g3 | 37.3610 ± 0.2944 | 30.2949 ± 0.3812 |
| TRINITY_DN32419_c0_g1 | --               | 29.9618 ± 0.3918 |
| TRINITY_DN37464_c0_g3 | --               | 30.4087 ± 0.2826 |
| TRINITY_DN38884_c0_g1 | --               | 29.4363 ± 0.1464 |
| TRINITY_DN24326_c0_g1 | --               | 30.2033 ± 0.2681 |
| TRINITY_DN40971_c0_g1 | --               | 30.8122 ± 0.3285 |
| TRINITY_DN34758_c0_g1 | --               | 29.0019 ± 0.1400 |
| <i>RPL13</i>          | 24.6785 ± 0.3439 | 23.2646 ± 0.0612 |

'--' cannot detect

**Table S3. Primers used in semi-RT-qPCR and RT-qPCR for validation of differentially expressed genes.**

| Gene                         | Primer sequences (5'-3') | Length<br>(bp) | FC<br>(O/T) | Log2FC<br>(O/T) | Annotation                                        |
|------------------------------|--------------------------|----------------|-------------|-----------------|---------------------------------------------------|
| Testis-up-regulated unigenes |                          |                |             |                 |                                                   |
| TRINITY_DN36203_c0_g1-F      | GAGCGTCGGTACACATAAA      | 131            | 0.00        | -15.66          | arginine kinase                                   |
| TRINITY_DN36203_c0_g1-R      | GTACACGCCTTCTTCAGAC      |                |             |                 |                                                   |
| TRINITY_DN36769_c0_g1-F      | GTTTGGTCTCTTGGAGTTGT     | 126            | 0.00        | -15.62          | testis-specific serine/threonine-protein kinase 3 |
| TRINITY_DN36769_c0_g1-R      | CGTTACTACTCGACCTGAAAG    |                |             |                 |                                                   |
| TRINITY_DN32154_c0_g1-F      | CACAAGGAGGGAGCATTAT      | 112            | 0.00        | -15.28          | L-lactate dehydrogenase isoform X2                |
| TRINITY_DN32154_c0_g1-R      | TCAGTGATTCCGTTTGATCC     |                |             |                 |                                                   |

|                         |                       |     |      |        |                                       |
|-------------------------|-----------------------|-----|------|--------|---------------------------------------|
| TRINITY_DN34503_c0_g1-F | CACCTTACCTCCTGACGATA  | 118 | 0.00 | -15.17 | venom allergen 5-like                 |
| TRINITY_DN34503_c0_g1-R | ATGCCACAGTCTCTCATTTC  |     |      |        |                                       |
| TRINITY_DN3474_c0_g1-F  | GCTCTACTTGGTGCCTAATC  | 144 | 0.00 | -15.13 | alpha-1,3/1,6-mannosyltransferase     |
| TRINITY_DN3474_c0_g1-R  | TCCACAAGAGGCATCATAAC  |     |      |        | ALG2-like                             |
| TRINITY_DN34469_c0_g1-F | CCTCGAAAGCCTATCATTCC  | 124 | 0.00 | -15.09 | glandular kallikrein-3,               |
| TRINITY_DN34469_c0_g1-R | CAGGTTGTGGTAGTGGATTT  |     |      |        | submandibular-like                    |
| TRINITY_DN38009_c0_g1-F | TCCCAACTCAGACTGTTCTA  | 104 | 0.00 | -15.08 | proteasomal ubiquitin receptor        |
| TRINITY_DN38009_c0_g1-R | GTGGACGTGTTTGGACTATT  |     |      |        | ADRM1-like                            |
| TRINITY_DN37061_c0_g1-F | CAGGGACAAACAGACTTACC  | 100 | 0.00 | -15.08 | hypothetical protein AMK59            |
| TRINITY_DN37061_c0_g1-R | ACTCCTCTACAGTGGCTATT  |     |      |        |                                       |
| TRINITY_DN38116_c0_g1-F | CAACTGCTCCCGTACTAAA   | 137 | 0.00 | -14.76 | parkin coregulated gene protein       |
| TRINITY_DN38116_c0_g1-R | CCTCCTGTTCTTTCATCAA   |     |      |        | homolog                               |
| TRINITY_DN39900_c0_g1-F | CGCTAAGAGCTGAGGACTA   | 128 | 0.00 | -14.70 | protein-glutamate O-methyltransferase |
| TRINITY_DN39900_c0_g1-R | TTGAAGCATTGTTGGACGA   |     |      |        |                                       |
| TRINITY_DN36997_c0_g1-F | CGAGTACACTGCCAACTT    | 104 | 0.00 | -14.62 | carnitine O-acetyltransferase-like    |
| TRINITY_DN36997_c0_g1-R | CCATGTCCAACGGGTTATT   |     |      |        |                                       |
| TRINITY_DN36816_c1_g1-F | CCTCATTGGTGCATCTACTC  | 131 | 0.00 | -14.59 | NADP-dependent malic enzyme-like      |
| TRINITY_DN36816_c1_g1-R | CCTGTGGTGTACATTCAGTT  |     |      |        |                                       |
| TRINITY_DN40076_c0_g1-F | GCATTCTCGCCTGGTATTT   | 107 | 0.00 | -14.57 | NADP-dependent malic enzyme-like      |
| TRINITY_DN40076_c0_g1-R | GCGTCTTCTGCAGTACATT   |     |      |        |                                       |
| TRINITY_DN37352_c0_g2-F | CATCGGAGGAAAGCTGTATG  | 123 | 0.00 | -14.53 | cytosol aminopeptidase-like           |
| TRINITY_DN37352_c0_g2-R | CCCAAACCTGCTACTGAAAT  |     |      |        |                                       |
| TRINITY_DN28048_c0_g1-F | ACAGTGTTCGAGATGAAA    | 118 | 0.00 | -14.44 | protein D3-like                       |
| TRINITY_DN28048_c0_g1-R | AGCCTTGGTACTCCTAAA    |     |      |        |                                       |
| TRINITY_DN37903_c0_g1-F | GAAGATGCAGCGAACAATTAC | 137 | 0.00 | -14.42 | tubulin alpha-4 chain-like            |
| TRINITY_DN37903_c0_g1-R | CCAAAGGAGTGGAAGACAAA  |     |      |        |                                       |

| Ovary-up-regulated unigenes |                       |     |         |       |                                       |
|-----------------------------|-----------------------|-----|---------|-------|---------------------------------------|
| TRINITY_DN35620_c0_g2-F     | GCGAATGGAACGGAGAAT    | 134 | 2779.18 | 11.44 | uncharacterized protein LOC108911198  |
| TRINITY_DN35620_c0_g2-R     | TCGGACACTCGTGAAGAA    |     |         |       |                                       |
| TRINITY_DN37242_c1_g2-F     | AGGATTCGTGAGAACAAC    | 121 | 2047.99 | 11.00 | uncharacterized protein LOC109609123  |
| TRINITY_DN37242_c1_g2-R     | GTCGACAACGGTTACCTTAC  |     |         |       |                                       |
| TRINITY_DN37127_c1_g1-F     | TGTGGTTTGTGTGAAGTAGG  | 115 | 1725.60 | 10.75 | uncharacterized protein LOC111513761  |
| TRINITY_DN37127_c1_g1-R     | CCTTTAGCAGGTCGTTTCATT |     |         |       |                                       |
| TRINITY_DN31659_c0_g1-F     | GACACACAGCTATGGTGAAG  | 123 | 1584.11 | 10.63 | Pxs                                   |
| TRINITY_DN31659_c0_g1-R     | CGATTCTTAGGTTCCGTTGG  |     |         |       |                                       |
| TRINITY_DN33161_c0_g1-F     | GCTCGCTGTGGTGATATAAA  | 140 | 1473.29 | 10.52 | nuclear cap-binding protein subunit 2 |
| TRINITY_DN33161_c0_g1-R     | TCAAGATTCGTGCCGTTAAT  |     |         |       |                                       |
| TRINITY_DN35988_c5_g2-F     | GTACCGCCTACCATTGTAAC  | 134 | 1469.59 | 10.52 | ankyrin-1-like                        |
| TRINITY_DN35988_c5_g2-R     | GGAACCCTCAGCTTAACTTC  |     |         |       |                                       |
| TRINITY_DN36847_c0_g3-F     | CAGTTTGTACGATGCCTAT   | 121 | 1358.69 | 10.41 | ceramide-1-phosphate transfer protein |
| TRINITY_DN36847_c0_g3-R     | CAAACCTTTGCCAACAACCTC |     |         |       |                                       |
| TRINITY_DN32419_c0_g1-F     | CAGACTTCGACCACTTTCAT  | 110 | 1293.37 | 10.34 | ras-like GTP-binding protein RHO      |
| TRINITY_DN32419_c0_g1-R     | TTACTTCAGGGAGCCATTTC  |     |         |       |                                       |
| TRINITY_DN37464_c0_g3-F     | GCAACTCGGAATCTTGGTAG  | 143 | 1221.33 | 10.25 | REST corepressor 2-like               |
| TRINITY_DN37464_c0_g3-R     | ACACAGTCCTCCCTCTTTAT  |     |         |       |                                       |
| TRINITY_DN38884_c0_g1-F     | GATTTGCCGCAATACAAAT   | 128 | 1219.42 | 10.25 | UDP-glucuronosyltransferase 1-7       |
| TRINITY_DN38884_c0_g1-R     | CTGTCCTGCTATGTGCTAAA  |     |         |       |                                       |
| TRINITY_DN24326_c0_g1-F     | CGGACGATGAAGGAGATAGA  | 111 | 1149.35 | 10.17 | uncharacterized protein LOC109609449  |
| TRINITY_DN24326_c0_g1-R     | CCGATGGACTTGGAGATGA   |     |         |       |                                       |
| TRINITY_DN40971_c0_g1-F     | ACGGTATGATGACCCACA    | 117 | 1001.21 | 9.97  | zinc finger protein 107-like          |
| TRINITY_DN40971_c0_g1-R     | GTCACGTA CTGCCTCTCT   |     |         |       |                                       |
| TRINITY_DN34758_c0_g1-F     | CATCCCAGAAGAACCTGAAA  | 128 | 812.59  | 9.67  | protein snail homolog Snai-like       |



---

TRINITY\_DN34758\_c0\_g1-R

ATGAGGGTGGAGGAGAAATA

---

O/T: Ovary/Testis

**Table S4. Primers used for dsRNA synthesise**

| Gene          | Primer sequences (5'-3')                | Length (bp) |
|---------------|-----------------------------------------|-------------|
| dsRC2-like-F  | taatagactcactatagggATGAAGACCCGGCTGAAAC  | 394         |
| dsRC2-like-R  | taatagactcactatagggAGCTCGCTTATTCGGTCAAA |             |
| dsPSHS-like-F | taatagactcactatagggGGTGTATTATCCCCGAGCAA | 398         |
| dsPSHS-like-R | taatagactcactatagggGGTGTCTGTTCCCTGTCGT  |             |
